# Supplementary material for: GeVaDSs – decision support system for novel Genetic Vaccine development process
Source: PubMed Central journal article supplement (PMC3531312; doi:10.1186/1471-2105-13-91), 2012-05-10
Supplement: 1471-2105-13-91-S2.pdf [file 1471-2105-13-91-S2.pdf]

# Identification of a new virus

Potential of this **vaccine platform** candidate?

## Experimental data production

Production of **vectors**

Slides 3-4

Set up of  
**immunization protocols**

Slide 8

Immunization of **mice** with  
**vector constructs & CompuVac**  
reference vectors

Slide 12

Measurements of  
**immune response parameters**  
T-cell B-cell Transcriptome

## Database

Insert new **vector entries**

Slides 5-7

Insert new  
**immunization protocol entries**

Slides 9-11

Insert new  
**Experiment and associated**  
**Experimental Group entries**

Slides 13-16

Fill up corresponding  
**Experiment templates**

UPLOAD

Slides 17-18

## Data analysis

Experiment **Quality Check?**

User-validation

No

Yes

No

Validation

Reject

5

**Parameter comparisons**

**New vector vs. Internal Standard (+ Naïve)**

- Individual results
- Experimental groups results
- Experiment results
- Comparison of experiments

Slides 19-24

DOWNLOAD

**Analysis Reports**

**Conclusion** on the overall **potential** of the  
virus as a new **vector platform**
