# Supplementary material for: GeVaDSs – decision support system for novel Genetic Vaccine development process
Source: BMC Bioinformatics. 2012 May 10;13:91. doi: 10.1186/1471-2105-13-91 (PMC3531312; doi:10.1186/1471-2105-13-91)
Supplement: Additional file 1 — A simulated example of GeVaDSs use. Testing the potential of a newly isolated virus as a new vaccine platform. [file 1471-2105-13-91-S1.pdf]

## A **simulated** example of GeVaDSs use:

- testing the potential of a newly isolated virus as a new vaccine platform

*Compuvac warning: This end-user demonstration is provided as a tutorial for GeVaDSs main features. All data used in this example are available in GeVaDSs for demonstration purpose. Although based on actual experimental data produced during the course of the Compuvac project, all characters and facts in this story are purely factitious. Any resemblance with existing characters or facts would be a coincidence...*

# A simulated example of GeVaDSs use (1)

---

- Paul, a leading expert in virology, sums up his recent discovery of PEV:
  - *PEV (Pig Encephalitis Virus) was isolated during an epidemic outbreak of encephalitis in pigs in South-East Asia.*
  - *+ss RNA replication in the cytoplasm (no integration in host genome).*
  - *PEV can infect human as well as non-human primate and rodent cells, in particular dendritic cells.*
  - *It can be engineered as non-replicating particles.*
  - *PEV can accommodate 5kb foreign genes.*
- Paul wonders about the potential of PEV as a new vaccine vector :
  - *How to evaluate the potential of this vaccine platform candidate?*
  - *How does it compare to other available vector platforms?*
  - *What antigen to choose and what immune parameters to follow?*
  - *Is there a standardized protocol to evaluate new vectors?*

## A simulated example of GeVaDSs use (2)

---

- Paul searches for “genetic vaccine standardization” and reads about the CompuVac’s strategy and GeVaDSs database interface.
- Paul contacts CompuVac’s coordinator and receives a login to GeVaDSs
- After browsing GeVaDSs user manual and retrieving Compuvac SOPs, Paul decides to proceed and follow CompuVac’s vector testing procedure:
  1. Appropriate vector constructs are produced including standard T-cell (LCMV p33-41) and B-cell (VSV-G protein) antigens.
  2. The three vector constructs (PEVdelta, PEVdelta-gp33, PEVdelta-VSVG) are added to GeVaDSs vector database.
  3. Mice are immunized with vector constructs according to fully documented and standardized immunization protocols. Considering the natural mucosal infection route of PEV, Paul decides to immunize mice intranasally (IN) with  $10^8$  virus particles.
  4. The immunization protocols are added to GeVaDSs.
  5. Experimental vaccines are evaluated against controls (naïve animals) and CompuVac reference vector (internal standard).
  6. T-cell & B-cell data as well as molecular signature data can be collected and automatically entered in GeVaDSs database (see Exp. E140, E141, E225, E142, E227). Experimental groups are linked to the corresponding immunization protocols.
  7. Experiment reports can be generated for vector performance evaluation.

## A simulated example of GeVaDSs use (3)

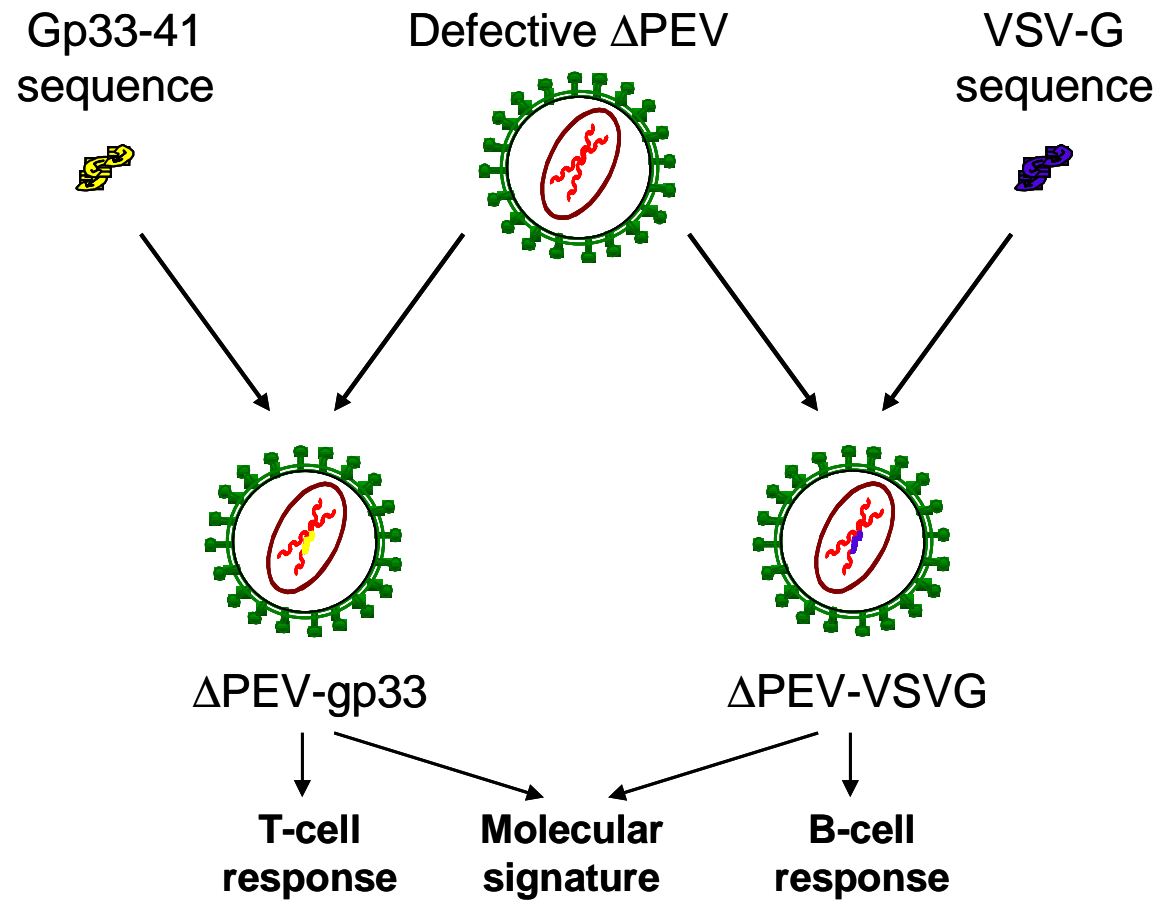

CompuVac's vector construction strategy

## A simulated example of GeVaDSs use (4)

---

- Paul searches for “genetic vaccine standardization” and reads about the CompuVac’s strategy and GeVaDSs database interface.
- Paul contacts CompuVac’s coordinator and receives a login to GeVaDSs
- After browsing GeVaDSs user manual and retrieving Compuvac SOPs, Paul decides to proceed and follows CompuVac’s vector testing:
  1. Appropriate vector constructs are produced including standard T-cell (LCMV p33-41) and B-cell (VSV-G protein) antigens.
  2. The three vector constructs (PEVdelta, PEVdelta-gp33, PEVdelta-VSVG) are added to GeVaDSs vector database.
  3. Mice are immunized with vector constructs according to fully documented and standardized immunization protocols. Considering the natural mucosal infection route of PEV, Paul decides to immunize mice intranasally (IN) with  $10^8$  virus particles.
  4. The immunization protocols are added to GeVaDSs.
  5. Experimental vaccines are evaluated against controls (naïve animals) and CompuVac reference vector (internal standard).
  6. T-cell & B-cell data as well as molecular signature data can be collected and automatically entered in GeVaDSs database (see Exp. E140, E141, E225, E142, E227). Experimental groups are linked to the corresponding immunization protocols.
  7. Experiment reports can be generated for vector performance evaluation.

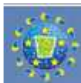

# Genetic Vaccine Decision Support System

Start Parameters T cell response B cell response Molecular signature Challenge Evaluation Administration

- Welcome
- Experimental
- Challenge protocols
- Immunization protocols
- Vectors

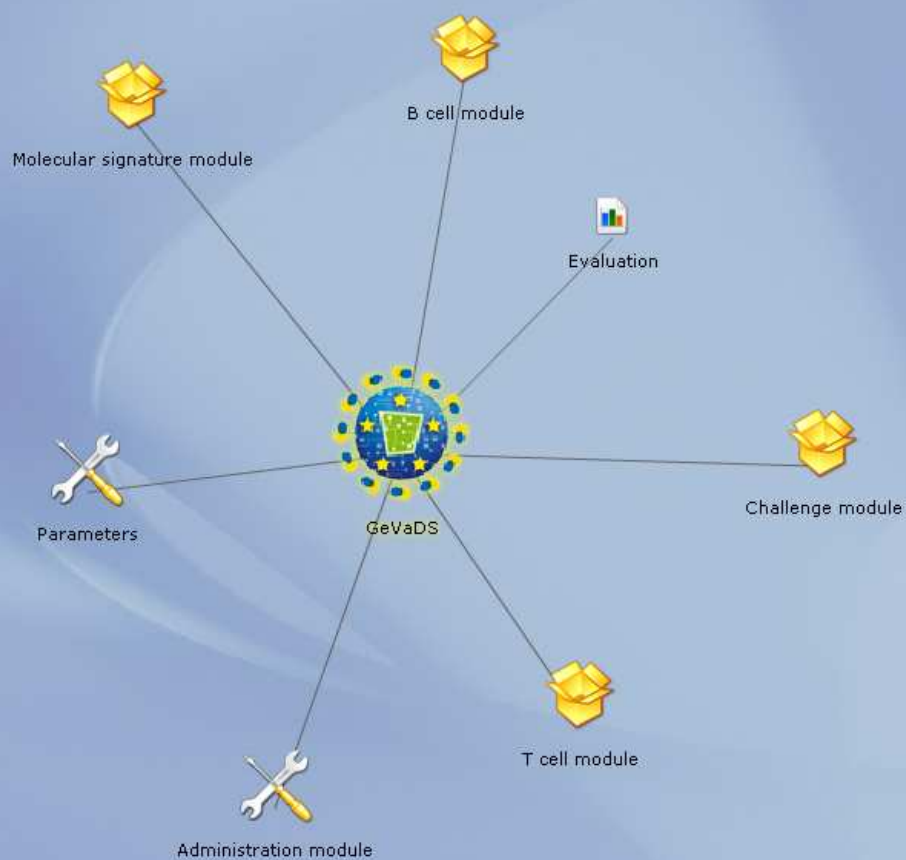

Double click an item to make it the current item, drag the background to scroll

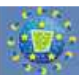

# Genetic Vaccine Decision Support System

Start Parameters T cell response B cell response Molecular signature Challenge Evaluation Administration

## Vectors

### Vector categories

- ▼ VECTOR TREE [119]
  - ▶ vaccines not expressed in vivo [52]
  - ▶ vaccines expressed in vivo [41]
- other [26]

### Category description

Name:  
other

Description:

### Vectors

#### Search filter

| Name            | T antigen |
|-----------------|-----------|
| gp33-41 peptide | ✓         |
| VLP Qb gp33-41  | ✓         |
| Hepes           | ?         |
| PBS             | ?         |
| CpG             | ✓         |
| dsRNA           | ✓         |
| noname          | ?         |
| pA1-BI26        | ✓         |
| Ep35/26         | ✓         |
| GTU Plasmid DNA | ?         |
| Ep35/26         | ✓         |
| PEV-delta       | ?         |
| PEV-delta-gp33  | ✓         |
| PEV-delta-VSVG  | ?         |
| X27             | ?         |
| ...             | ?         |

### Vector: PEV-delta-gp33

Details Antigens Batches Ownership & Sharing

Vector category: \* other

Select...

Name: \* PEV-delta-gp33

Laboratory: \* UPMC

Concentration unit: \* particles/mL

T antigen: ☐

B antigen: ☐

Conversion factor: 0

Description: Training Example: Pig Encephalitis Virus delta structural genes (no replication) with insertion sequence LCMV gp33-41 epitope

Description file:

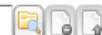

Save

Close

23 rows retrieved

Laboratory

page 1 of 1

### Vector description

Name:  
PEV-delta-gp33

Description:  
Training Example: Pig Encephalitis Virus delta structural genes (no replication) with insertion sequence LCMV gp33-41 epitope

Insert Update Delete

## A simulated example of GeVaDSs use (5)

---

- Paul searches for “genetic vaccine standardization” and reads about the CompuVac’s strategy and GeVaDSs database interface.
- Paul contacts CompuVac’s coordinator and receives a login to GeVaDSs
- After browsing GeVaDSs user manual and retrieving Compuvac SOPs, Paul decides to proceed and follows CompuVac’s vector testing:
  1. Appropriate vector constructs are produced including standard T-cell (LCMV p33-41) and B-cell (VSV-G protein) antigens.
  2. The three vector constructs (PEVdelta, PEVdelta-gp33, PEVdelta-VSVG) are added to GeVaDSs vector database.
  3. Mice are immunized with vector constructs according to fully documented and standardized immunization protocols. Considering the natural mucosal infection route of PEV, Paul decides to immunize mice intranasally (IN) with  $10^8$  virus particles.
  4. The immunization protocols are added to GeVaDSs.
  5. Experimental vaccines are evaluated against controls (naïve animals) and CompuVac reference vector (internal standard).
  6. T-cell & B-cell data as well as molecular signature data can be collected and automatically entered in GeVaDSs database (see Exp. E140, E141, E225, E142, E227). Experimental groups are linked to the corresponding immunization protocols.
  7. Experiment reports can be generated for vector performance evaluation.

## A simulated example of GeVaDSs use (6)

---

- Paul searches for “genetic vaccine standardization” and reads about the CompuVac’s strategy and GeVaDSs database interface.
- Paul contacts CompuVac’s coordinator and receives a login to GeVaDSs
- After browsing GeVaDSs user manual and retrieving CompuVac SOPs, Paul decides to proceed and follows CompuVac’s vector testing:
  1. Appropriate vector constructs are produced including standard T-cell (LCMV p33-41) and B-cell (VSV-G protein) antigens.
  2. The three vector constructs (PEVdelta, PEVdelta-gp33, PEVdelta-VSVG) are added to GeVaDSs vector database.
  3. Mice are immunized with vector constructs according to fully documented and standardized immunization protocols. Considering the natural mucosal infection route of PEV, Paul decides to immunize mice intranasally (IN) with  $10^8$  virus particles.
  4. The immunization protocols are added to GeVaDSs.
  5. Experimental vaccines are evaluated against controls (naïve animals) and CompuVac reference vector (internal standard).
  6. T-cell & B-cell data as well as molecular signature data can be collected and automatically entered in GeVaDSs database (see Exp. E140, E141, E225, E142, E227). Experimental groups are linked to the corresponding immunization protocols.
  7. Experiment reports can be generated for vector performance evaluation.

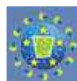

# Genetic Vaccine Decision Support System

Start Parameters T cell response B cell response Molecular signature Challenge Evaluation Administration

- Welcome
- Experimental
  - Challenge protocols
  - Immunization protocols
  - Vectors

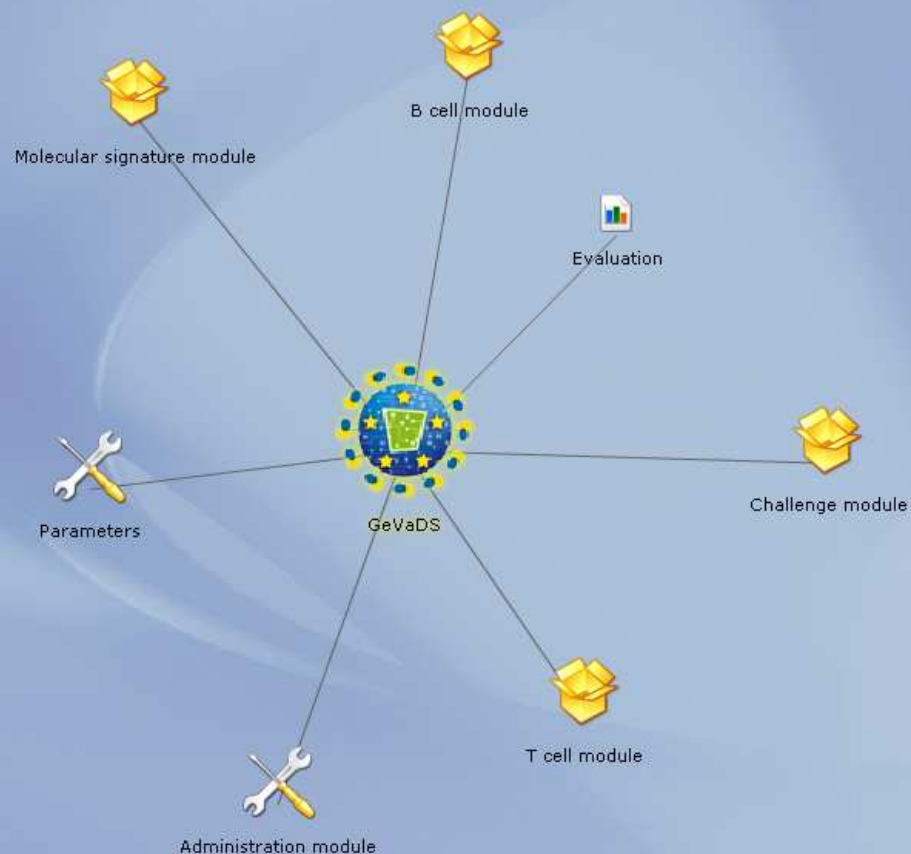

Double click an item to make it the current item; drag the background to scroll

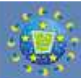

# Genetic Vaccine Decision Support System

Start Parameters T cell response B cell response Molecular signature Challenge Evaluation Administration

## Immunization protocols

▼ Search filter

Vector category tree:

- ▼ VECTOR TREE
  - ▶ vaccines not expressed in vivo
  - ▶ vaccines expressed in vivo
  - ▶ other

Vector: PEV-delta-gp33

Vector dose:

Antigen: not selected

Number of stages:

Administration route: IN

Search

Reset

### Description

#### Name:

Prime I1 (d1/[IN/PEV-delta-gp33/100000000]);

#### Description:

Training example: PEV-delta-gp33 10E8 particles, no adjuvant

Injection  
stage: Prime  
day: 1  
vectors:  
PEV-delta-gp33 100000000 IN

0

1

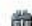

3 rows retrieved

| ID     | Name                                                    | Standard |
|--------|---------------------------------------------------------|----------|
| 000239 | Prime I1 (d1/[IN/PEV-delta-gp33/100000000]);            | ×        |
| 000241 | Prime I1 (d1/[IN/PEV-delta-gp33/100000000][IN/X13/50]); | ×        |
| 000242 | Prime I1 (d1/[IN/PEV-delta-gp33/100000000][IN/X27/50]); | ×        |

Data loaded.

page 1 of 1

Insert

Update

Delete

## A simulated example of GeVaDSs use (7)

---

- Paul searches for “genetic vaccine standardization” and reads about the CompuVac’s strategy and GeVaDSs database interface.
- Paul contacts CompuVac’s coordinator and receives a login to GeVaDSs
- After browsing GeVaDSs user manual and retrieving Compuvac SOPs, Paul decides to proceed and follows CompuVac’s vector testing:
  1. Appropriate vector constructs are produced including standard T-cell (LCMV p33-41) and B-cell (VSV-G protein) antigens.
  2. The three vector constructs (PEVdelta, PEVdelta-gp33, PEVdelta-VSVG) are added to GeVaDSs vector database.
  3. Mice are immunized with vector constructs according to fully documented and standardized immunization protocols. Considering the natural mucosal infection route of PEV, Paul decides to immunize mice intranasally (IN) with  $10^8$  virus particles.
  4. The immunization protocols are added to GeVaDSs.
  5. Experimental vaccines are evaluated against controls (naïve animals) and CompuVac reference vector (internal standard).
  6. T-cell & B-cell data as well as molecular signature data can be collected and automatically entered in GeVaDSs database (see Exp. E140, E141, E225, E142, E227). Experimental groups are linked to the corresponding immunization protocols.
  7. Experiment reports can be generated for vector performance evaluation.

## A simulated example of GeVaDSs use (8)

---

- Paul searches for “genetic vaccine standardization” and reads about the CompuVac’s strategy and GeVaDSs database interface.
- Paul contacts CompuVac’s coordinator and receives a login to GeVaDSs
- After browsing GeVaDSs user manual and retrieving Compuvac SOPs, Paul decides to proceed and follows CompuVac’s vector testing:
  1. Appropriate vector constructs are produced including standard T-cell (LCMV p33-41) and B-cell (VSV-G protein) antigens.
  2. The three vector constructs (PEVdelta, PEVdelta-gp33, PEVdelta-VSVG) are added to GeVaDSs vector database.
  3. Mice are immunized with vector constructs according to fully documented and standardized immunization protocols. Considering the natural mucosal infection route of PEV, Paul decides to immunize mice intranasally (IN) with  $10^8$  virus particles.
  4. The immunization protocols are added to GeVaDSs.
  5. Experimental vaccines are evaluated against controls (naïve animals) and CompuVac reference vector (internal standard).
  6. T-cell & B-cell data as well as molecular signature data can be collected and automatically entered in GeVaDSs database (see Exp. E140, E141, E225, E142, E227). Experimental groups are linked to the corresponding immunization protocols.
  7. Experiment reports can be generated for vector performance evaluation.

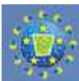

# Genetic Vaccine Decision Support System

Start Parameters T cell response B cell response Molecular signature Challenge Evaluation Administration

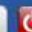

Welcome...

Data

- Individual results
- Experimental group results
- Experiment results
- Comparison of experiments

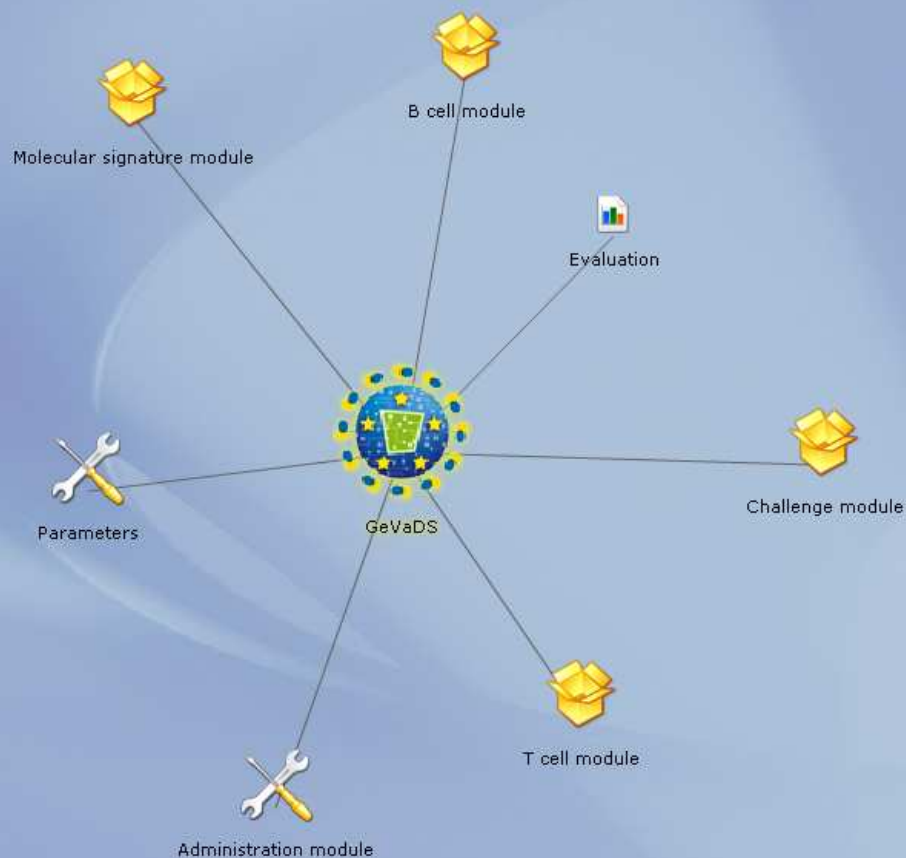

Double click an item to make it the current item, drag the background to scroll



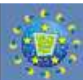

# Genetic Vaccine Decision Support System

Start Parameters T cell response B cell response Molecular signature Challenge Evaluation Administration

## T cell raw data - experimental groups

Experiment: **E140-UPMC-EG5**

5 rows retrieved

| Name                    | Type                 | Sex    | Age | Animal model      | Immunization protocol                                     | St... |
|-------------------------|----------------------|--------|-----|-------------------|-----------------------------------------------------------|-------|
| Naive                   | Naive                | female | 7   | Adoptive transfer | [000022] No injection                                     | ● A   |
| PEV-delta-empty         | Experimental Vaccine | female | 7   | Adoptive transfer | [000238] Prime I1 (d1/[IN/PEV-delta/100000000]);          | ● U   |
| PEV-delta-gp33          | Experimental Vaccine | female | 7   | Adoptive transfer | [000239] Prime I1 (d1/[IN/PEV-delta-gp33/100000000]);     | ● U   |
| IS - GVO43              | Internal Standard    | female | 7   | Adoptive transfer | [000010] Prime I1 (d1/[IM/AdGVO43/100000000]);            | ● U   |
| IS - gp33 peptide + IFA | Internal Standard    | female | 7   | Adoptive transfer | [000004] Prime I1 (d1/[SC/gp33-41 peptide/50][SC/IFA/0]); | ● U   |

### Experimental group: PEV-delta-gp33

Details Ownership & Sharing

Name: \* PEV-delta-gp33

Immunization protocol [000239] Prime I1 (d1/[IN/PEV-delta-gp33/100000000]);

Create new...

Type: \* Experimental Vaccine

Animal model: \* Adoptive transfer - C57BL/6 - cells from P14 x Ly 5.1

Sex: \* female

Age: \* 7

Description:

Save

Cancel

Data loaded.

page 1 of 1

Insert

Update

Delete

View QC report

Set Quality status

Inoculation batches

Previous

Next

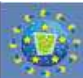

# Genetic Vaccine Decision Support System

Start Parameters T cell response B cell response Molecular signature Challenge Evaluation Administration

## T cell raw data - experiments

Advanced filter

Experiment date: from:  to:

Animal model:

Laboratory:

Vector:

Sex:

Administration route:

Age:

Antigen:

Experimental group type:

Antigen dose:

Search Reset

### Description

#### Default animal model

Adoptive transfer - C57BL/6 - cells from P14 x Ly 5.1

#### Default sex

female

#### Default age

7 [weeks]

#### Description

Training example: Evaluation of PEV-delta & PEV-delta-gp33 against Naive & Internal standards (GVO43 & Peptide+IFA)

Export empty data template

| Name          | Laboratory | Date       | Flags                     | Status     |
|---------------|------------|------------|---------------------------|------------|
| E140-UPMC-EG5 | UPMC       | 2008-07-06 | A: 1 U: 4 P: 0 R: 0 NC: 0 | U EC ready |
| E141-UPMC-EG6 | UPMC       | 2008-08-06 | A: 3 U: 3 P: 0 R: 0 NC: 0 | U EC ready |

  

| Group #         | Type                 | Indiv. name | d5 %Tcr | d5 %Mem | d7 %Tcr | d7 %Mem | d10 %Tcr | d10 %Mem | %CFSE-hi | %CFSE-lo | %IFN-g | Status |
|-----------------|----------------------|-------------|---------|---------|---------|---------|----------|----------|----------|----------|--------|--------|
| Naive           | Naive                | M1          |         |         |         |         |          |          |          |          |        |        |
|                 |                      | M2          |         |         |         |         |          |          |          |          |        |        |
|                 |                      | M3          |         |         |         |         |          |          |          |          |        |        |
|                 |                      | M4          |         |         |         |         |          |          |          |          |        |        |
|                 |                      | M5          |         |         |         |         |          |          |          |          |        |        |
| PEV-delta-empty | Experimental Vaccine | M1          |         |         |         |         |          |          |          |          |        |        |
|                 |                      | M2          |         |         |         |         |          |          |          |          |        |        |
|                 |                      | M3          |         |         |         |         |          |          |          |          |        |        |
|                 |                      | M4          |         |         |         |         |          |          |          |          |        |        |
|                 |                      | M5          |         |         |         |         |          |          |          |          |        |        |
| PEV-delta-gp33  | Experimental Vaccine | M1          |         |         |         |         |          |          |          |          |        |        |
|                 |                      | M2          |         |         |         |         |          |          |          |          |        |        |
|                 |                      | M3          |         |         |         |         |          |          |          |          |        |        |
|                 |                      | M4          |         |         |         |         |          |          |          |          |        |        |
|                 |                      | M5          |         |         |         |         |          |          |          |          |        |        |

Data loaded.

page 1 of 1

Insert Update Delete Import template Export template View QC report Check quality Set Quality status

Next

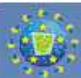

# Genetic Vaccine Decision Support System

Start Parameters T cell response B cell response Molecular signature Challenge Evaluation Administration

## T cell raw data - experiments

### Advanced filter

Experiment date: from:  to:  Animal model:  Please select an animal model

Laboratory:  Please select a laboratory Vector:  PEV-delta-gp33

Sex:  Please select a sex Administration route:  Please select an administration route

Age:  0 Antigen:  Please select an antigen

Experimental group type:  Please select a type Antigen dose:

Search Reset

### Description

#### Default animal model

Adoptive transfer - C57BL/6 - cells from P14 x Ly 5.1

#### Default sex

female

#### Default age

7 [weeks]

#### Description

Training example: Evaluation of PEV-delta & PEV-delta-gp33 against Naive & Internal standards (GVO43 & Peptide+IFA)

2 rows retrieved

| Name          | Laboratory | Date       | Flags                     | Status     |
|---------------|------------|------------|---------------------------|------------|
| E140-UPMC-EG5 | UPMC       | 2008-07-06 | A: 1 U: 4 P: 0 R: 0 NC: 0 | U EC ready |
| E141-UPMC-EG6 | UPMC       | 2008-08-06 | A: 3 U: 3 P: 0 R: 0 NC: 0 | U EC ready |

|         |       | d5          |      | d7   |      | d10  |      |      |          |          |        |        |  |
|---------|-------|-------------|------|------|------|------|------|------|----------|----------|--------|--------|--|
| Group # | Type  | Indiv. name | %Tcr | %Mem | %Tcr | %Mem | %Tcr | %Mem | %CFSE-hi | %CFSE-lo | %IFN-g | Status |  |
| Naive   | Naive | M1          | 0.75 | 4.9  | 0.56 | 9.4  | 0.64 | 11.5 | 42.28    | 57.72    | 3.1    | 1      |  |
|         |       | M2          | 0.84 | 7.6  | 0.69 | 12.2 | 0.72 | 13.2 | 42.54    | 57.46    | 3.92   | 1      |  |
|         |       | M3          | 1.21 | 6.7  | 0.97 | 8.2  | 1.05 | 10.5 | 48.66    | 51.34    | 13.7   | 1      |  |
|         |       | M4          | 0.68 | 22.2 | 0.67 | 20.9 | 0.68 | 23.8 | 53.7     | 46.3     | 3.85   | 1      |  |
|         |       | M5          | 0.82 | 25.3 | 0.67 | 10.5 | 0.65 | 27.9 | 54.1     | 45.9     | 6.26   | 1      |  |

|                 |                      | d5          |      | d7    |      | d10   |      |       |          |          |        |        |  |
|-----------------|----------------------|-------------|------|-------|------|-------|------|-------|----------|----------|--------|--------|--|
| Group #         | Type                 | Indiv. name | %Tcr | %Mem  | %Tcr | %Mem  | %Tcr | %Mem  | %CFSE-hi | %CFSE-lo | %IFN-g | Status |  |
| PEV-delta-empty | Experimental Vaccine | M1          | 1.05 | 18.18 | 0.7  | 16.44 | 0.87 | 17.46 | 45.57    | 53.92    | 2.82   | 1      |  |
|                 |                      | M2          | 1.41 | 21.36 | 0.97 | 18.11 | 1.51 | 26.47 | 44.5     | 55.32    | 1.5    | 1      |  |
|                 |                      | M3          | 0.42 | 17.02 | 0.87 | 24.79 | 0.72 | 10.2  | 43.65    | 56.07    | 8.05   | 1      |  |
|                 |                      | M4          | 0.85 | 8.51  | 1.36 | 5.71  | 0.94 | 14.5  | 40.1     | 59.9     | 10.3   | 1      |  |
|                 |                      | M5          | 1.08 | 16.1  | 1.18 | 8.11  | 0.83 | 24.6  | 49.1     | 50.9     | 5.17   | 1      |  |

|                |                      | d5          |      | d7    |      | d10   |      |      |          |          |        |        |  |
|----------------|----------------------|-------------|------|-------|------|-------|------|------|----------|----------|--------|--------|--|
| Group #        | Type                 | Indiv. name | %Tcr | %Mem  | %Tcr | %Mem  | %Tcr | %Mem | %CFSE-hi | %CFSE-lo | %IFN-g | Status |  |
| PEV-delta-gp33 | Experimental Vaccine | M1          | 5.41 | 90.94 | 1.13 | 79.9  | 0.97 | 75.4 | 2.28     | 97.72    | 25.7   | 1      |  |
|                |                      | M2          | 30.2 | 75.3  | 18.9 | 85.6  | 12.2 | 61.7 | 9.5      | 90.5     | 27.3   | 1      |  |
|                |                      | M3          | 12.9 | 92.18 | 2.68 | 87.5  | 1.67 | 83.9 | 0.54     | 99.46    | 64.7   | 1      |  |
|                |                      | M4          | 12.9 | 94.09 | 4.02 | 89.3  | 2.12 | 91.3 | 0.7      | 99.3     | 56.4   | 1      |  |
|                |                      | M5          | 18.2 | 96.83 | 3.4  | 91.66 | 1.67 | 88.4 | 0.34     | 99.66    | 63.8   | 1      |  |

Import full data template

Data loaded.

page 1 of 1

Insert Update Delete Import template Export template View QC report Check quality Set Quality status

Next

## A simulated example of GeVaDSs use (9)

---

- Paul searches for “genetic vaccine standardization” and reads about the CompuVac’s strategy and GeVaDSs database interface.
- Paul contacts CompuVac’s coordinator and receives a login to GeVaDSs
- After browsing GeVaDSs user manual and retrieving Compuvac SOPs, Paul decides to proceed and follows CompuVac’s vector testing:
  1. Appropriate vector constructs are produced including standard T-cell (LCMV p33-41) and B-cell (VSV-G protein) antigens.
  2. The three vector constructs (PEVdelta, PEVdelta-gp33, PEVdelta-VSVG) are added to GeVaDSs vector database.
  3. Mice are immunized with vector constructs according to fully documented and standardized immunization protocols. Considering the natural mucosal infection route of PEV, Paul decides to immunize mice intranasally (IN) with  $10^8$  virus particles.
  4. The immunization protocols are added to GeVaDSs.
  5. Experimental vaccines are evaluated against controls (naïve animals) and CompuVac reference vector (internal standard).
  6. T-cell & B-cell data as well as molecular signature data can be collected and automatically entered in GeVaDSs database (see Exp. E140, E141, E225, E142, E227). Experimental groups are linked to the corresponding immunization protocols.
  7. Experiment reports can be generated for vector performance evaluation.

## A simulated example of GeVaDSs use (10)

- Standardized comparison of  $\Delta$ PEV-gp33 with other GeVaDSs vaccines:

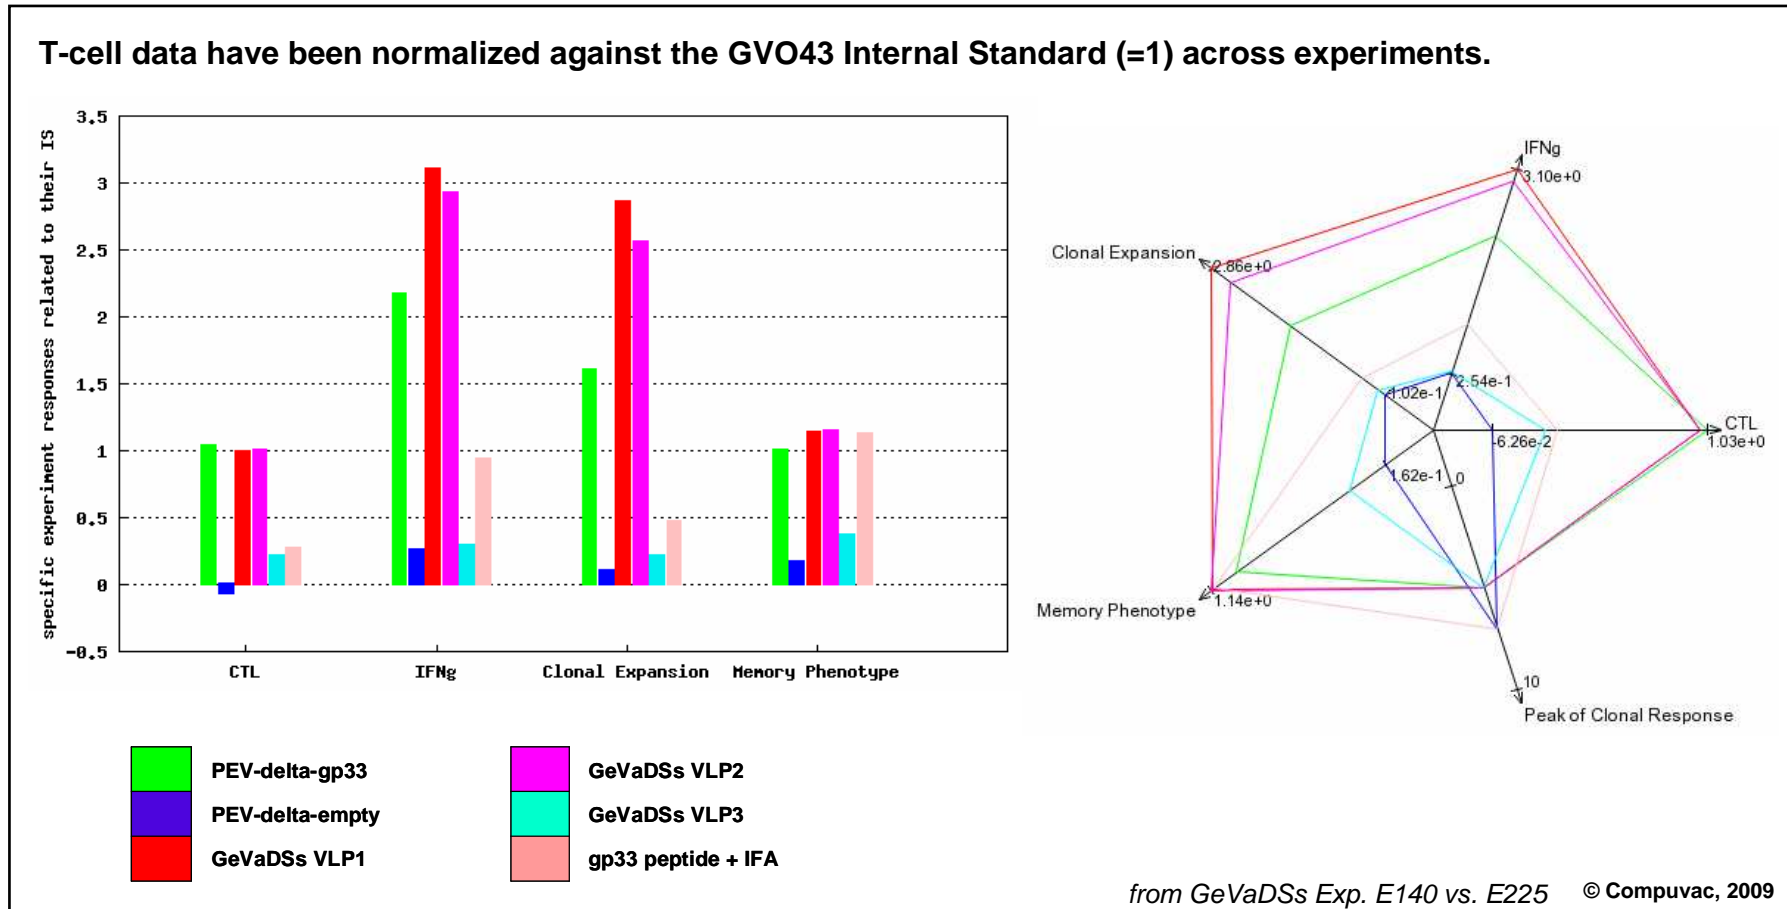

→  $\Delta$ PEV-gp33 performance is in-between that of the GVO43 internal positive control and GeVaDSs' validated "best" T-cell vaccines.

## A simulated example of GeVaDSs use (11)

---

- Paul goes on to check for PEV's capacity to produce antibodies
- GeVaDSs B-cell experiment → no significant neutralizing Ab produced against the VSV-G model antigen (see Exp. E142)
- Paul then tests PEV-induced Ab production in the presence of adjuvants.
- Two experimental adjuvants (X13 & X27) are tested, with the following questions:
  - Is T-cell response against PEV-gp33 altered?
  - Can Ab produced by B-cell response neutralize PEV-VSVG ?
  - What impact do adjuvants have on “toxicity” signatures of dendritic cells?

## A simulated example of GeVaDSs use (12)

- Is T-cell response against PEV-gp33 altered?

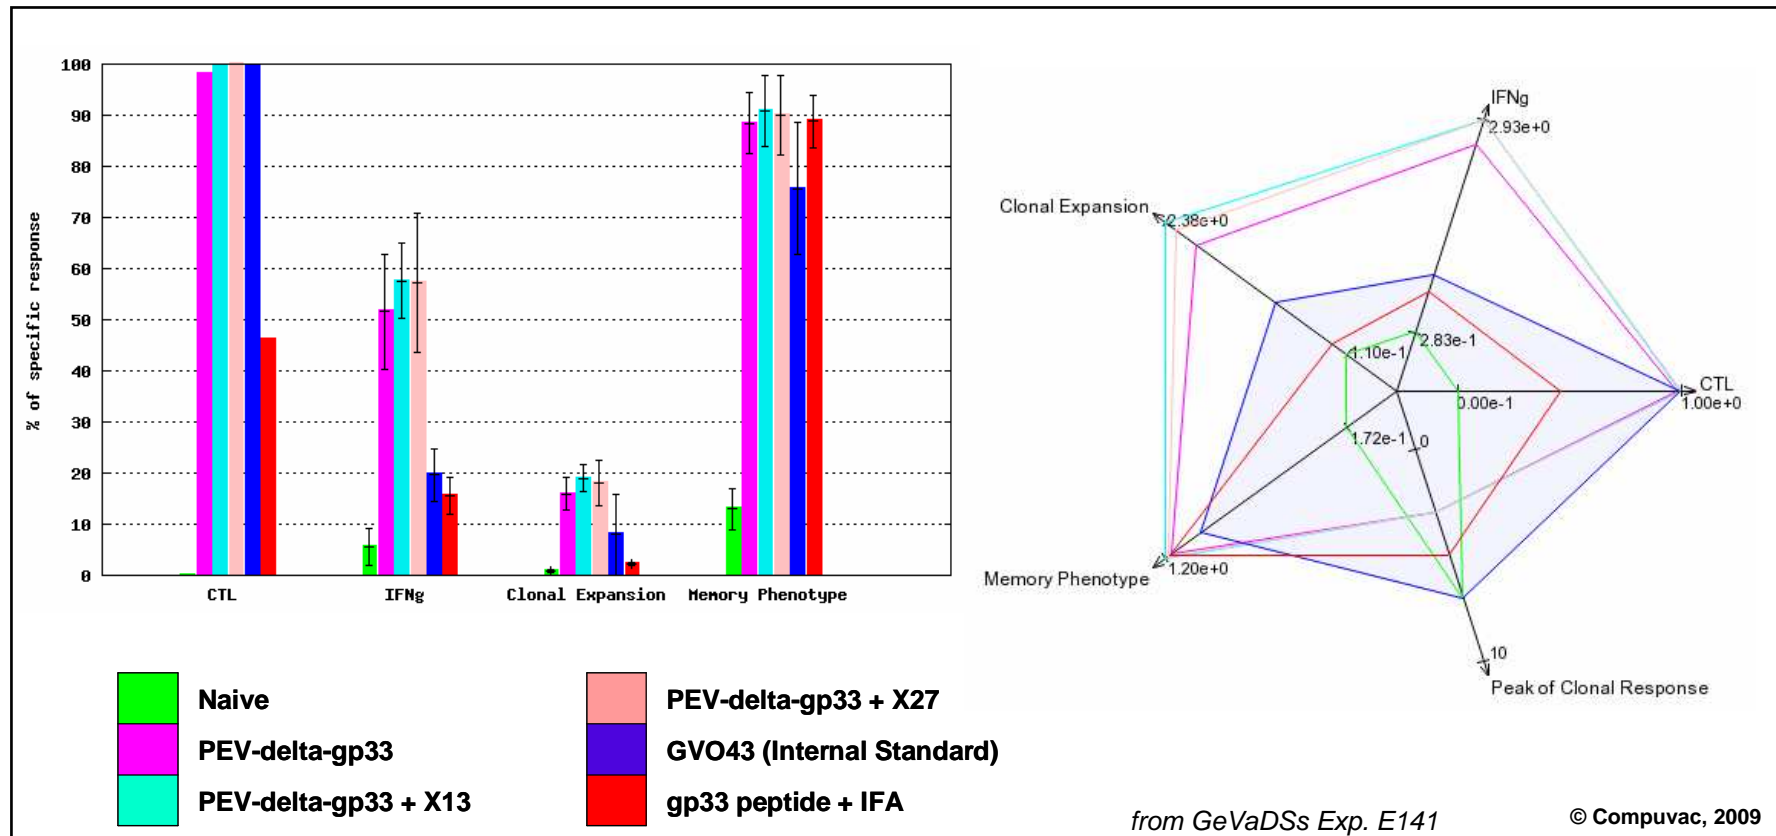

→  $\Delta$ PEV-gp33 performs similarly in the presence of X13/X27 adjuvants.

## A simulated example of GeVaDSs use (13)

- Can Ab produced by B-cell response neutralize PEV-VSVG ?

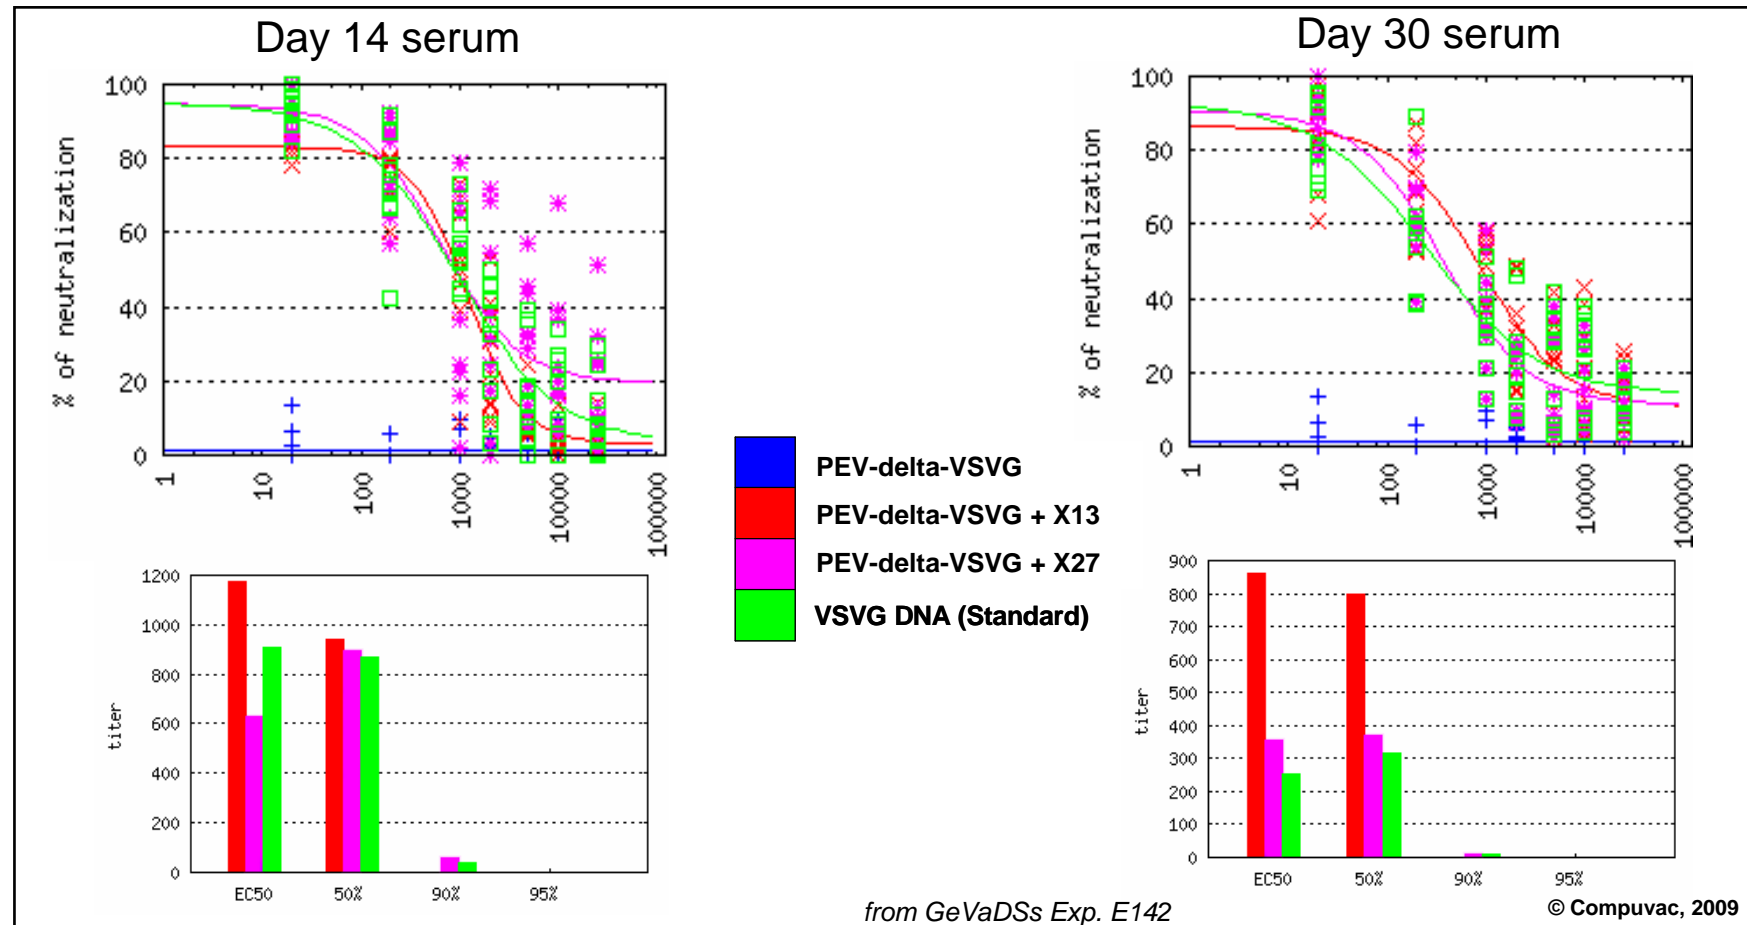

→  $\Delta$ PEV-VSVG with X13/X27 adjuvants elicits anti-VSVG neutralizing antibodies.

→ X13 adjuvant is more potent than X27.

# A simulated example of GeVaDSs use (14)

- What impact do adjuvants have on “toxicity” signatures of dendritic cells?

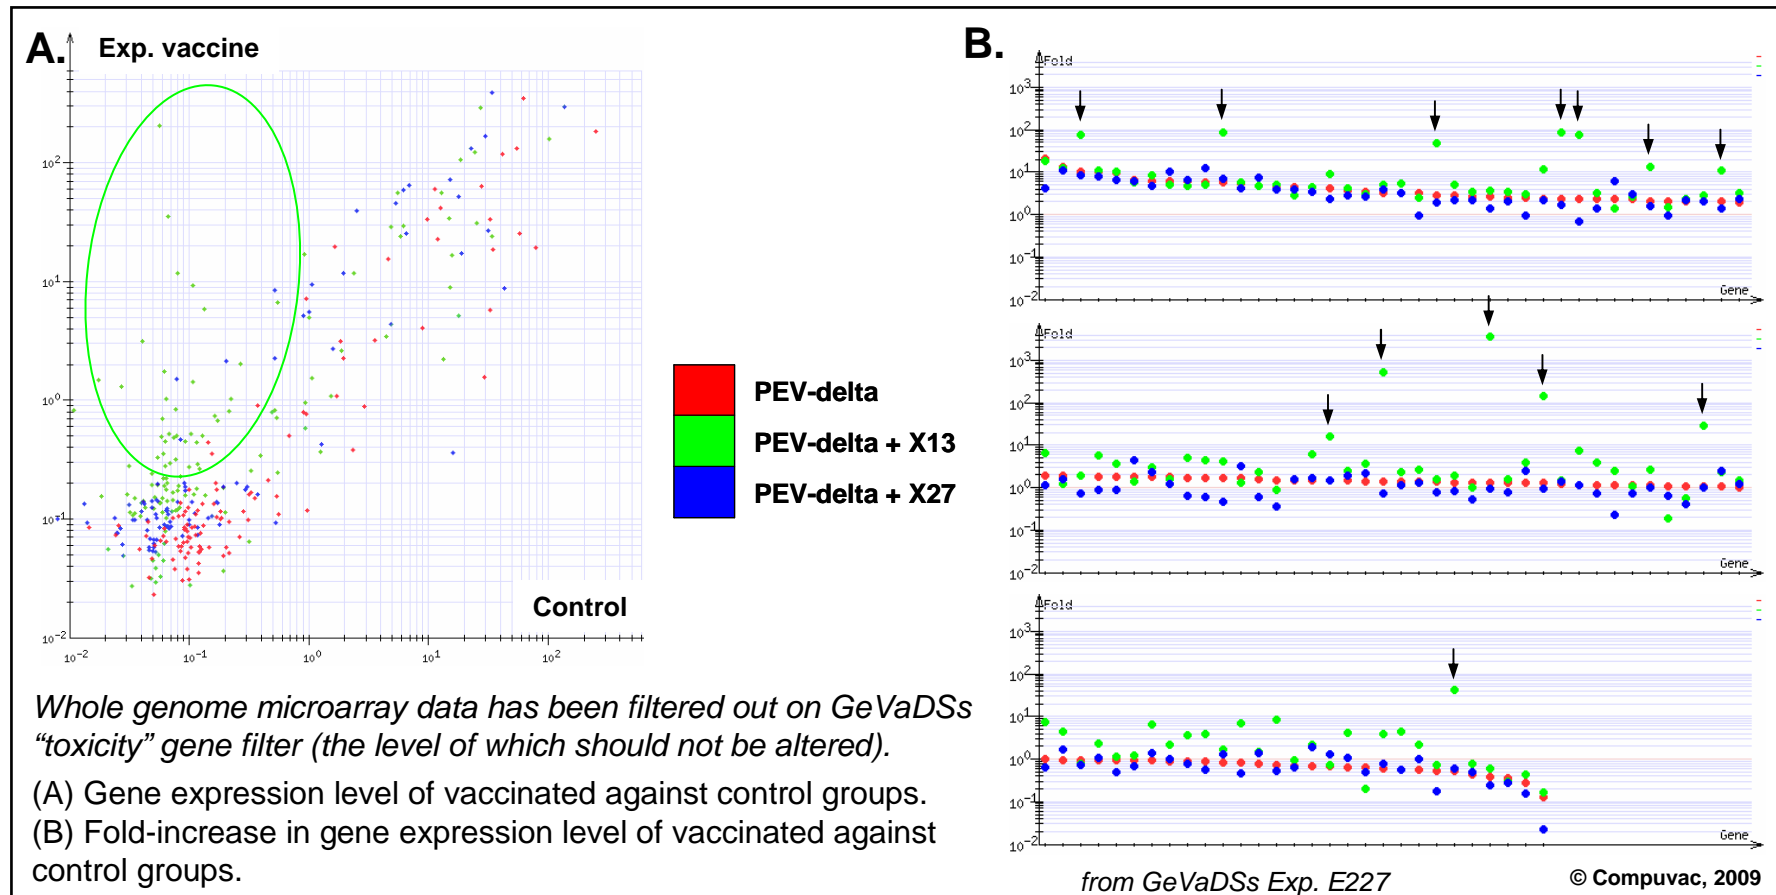

→ X13 adjuvant significantly alters the toxicity profile of dendritic cells compared to PEV alone or with X27. X13 should preferably not be used.

## A simulated example of GeVaDSs use (15)

- After a limited number of experiments, Paul can conclude on the overall potential of PEV as a new vector platform:

| Vector combination          | T-cell response | B-cell response | Molecular signature     |
|-----------------------------|-----------------|-----------------|-------------------------|
| $\Delta$ PEV alone          | ++              | -               | OK                      |
| $\Delta$ PEV + X13 adjuvant | ++              | ++              | Potential safety issues |
| $\Delta$ PEV + X27 adjuvant | ++              | +               | OK                      |

→ PEV is a good vaccine vector platform candidate, as revealed by GeVaDSs standardized evaluation strategy
